# Supplementary material for: SO3 decomposition over silica-modified β-SiC supported CuFe2O4 catalyst: characterization, performance, and atomistic insights
Source: Royal Society of Chemistry journal article supplement (doi:10.1039/d2nr01086k), 2022-01-01
Supplement: d2nr01086k1.pdf [file d2nr01086k1.pdf]

## Supplementary Information

# SO<sub>3</sub> decomposition over silica modified $\beta$ -SiC supported CuFe<sub>2</sub>O<sub>4</sub> catalyst: Characterization, performance, and atomistic insights

Sachin Tomar,<sup>a</sup> Deepika Gill,<sup>b</sup> Kishore Kondamudi,<sup>a</sup> Sreedevi Upadhyayula,<sup>\*a</sup> and Saswata Bhattacharya<sup>\*b</sup>

<sup>a</sup>Department of Chemical Engineering, Indian Institute of Technology Delhi, Hauz Khas, New Delhi -110016, India

<sup>b</sup>Department of Physics, Indian Institute of Technology Delhi, Hauz Khas, New Delhi -110016, India

\*Corresponding author

Email addresses: sreedevi@chemical.iitd.ac.in (Sreedevi Upadhyayula),  
saswata@physics.iitd.ac.in (Saswata Bhattacharya)

**S.1. Catalyst characterization.** Rigaku diffractometer using Ni-filtered with CuK $\alpha$  radiation at 40 kV and 15 mA was employed to obtain the X-ray diffraction (XRD) patterns. Nicolet iS50 FT-IR was used to collect Fourier transform infra-red spectroscopy (FT-IR) spectra in the range of 400–4000 cm<sup>-1</sup>. Physical Electronics (PHI 5000 Versa Probe III) with an Al K $\alpha$  was used for

X-ray photoelectron spectroscopy (XPS). The binding energies referenced to the C 1s peak at 284.6 eV. Belsorp-max II instrument was used to determine the Brunauer–Emmett–Teller (BET) surface area and pore volume. FEI Quanta 200 F was used to record the field emission scanning electron microscope–energy dispersive X-ray spectroscopy (FESEM–EDS) and elemental mapping. FEI Tecnai TF20 was employed to capture the transmission electron microscopy (TEM) and high resolution (HR) TEM images.

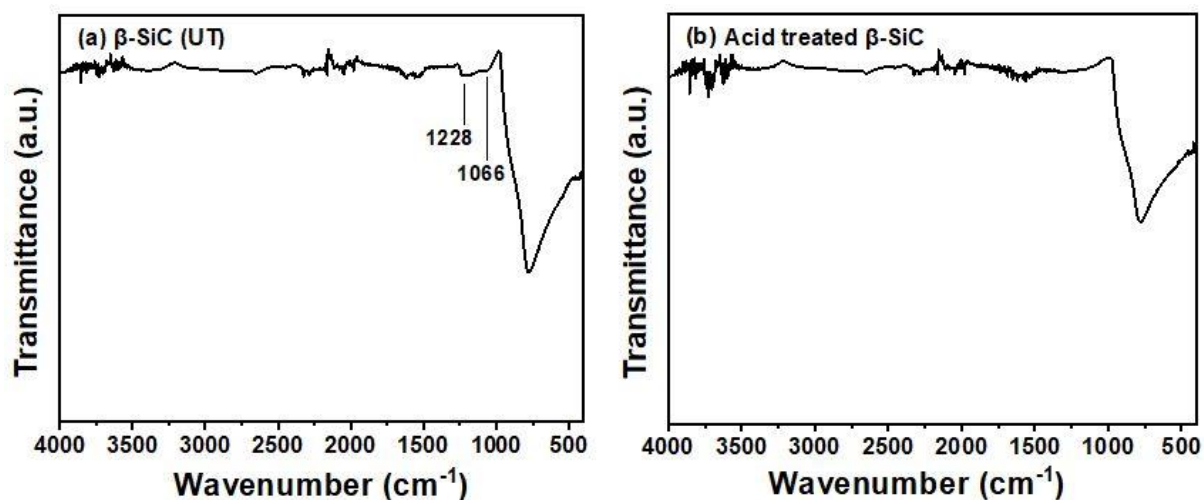

Figure S1 FTIR of (a)  $\beta$ -SiC (UT), and (b) acid treated  $\beta$ -SiC. Acid treatment leads to dissolution of  $\text{SiO}_x\text{C}_y/\text{SiO}_2$  phases and leaving SiC phase which is also evident from the absence of peaks at 1066 to 1164, 1228  $\text{cm}^{-1}$  in the FTIR spectra of acid treated  $\beta$ -SiC.

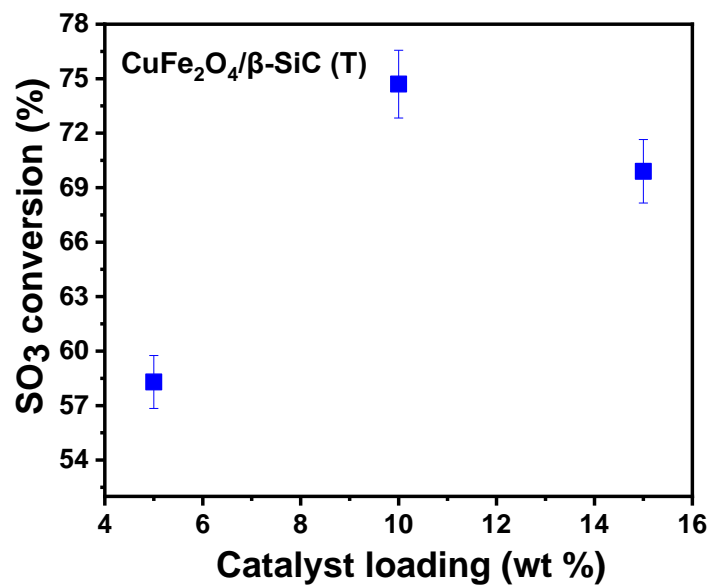

Figure S2 Effect of CuFe<sub>2</sub>O<sub>4</sub> loading over β-SiC (T) support.

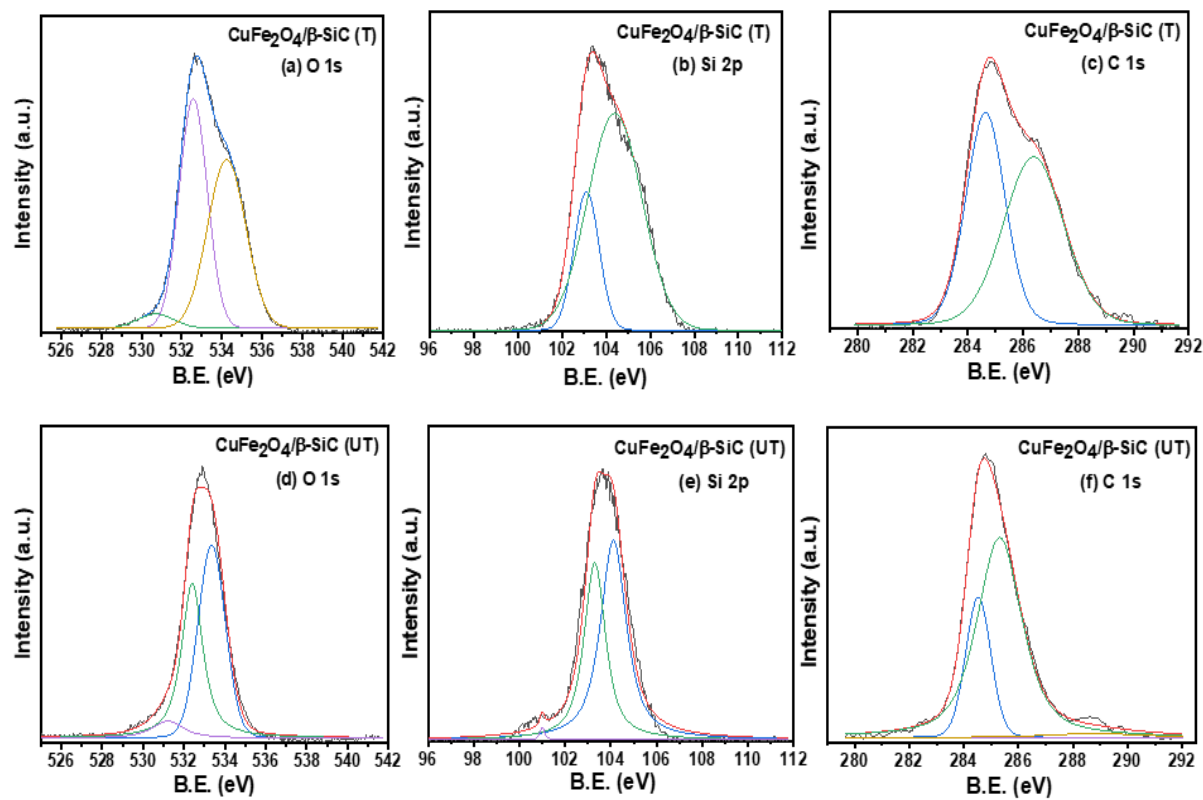

Figure S3 XPS of O 1s, Si 2p, C 1s of the (a–c)  $\text{CuFe}_2\text{O}_4/\beta\text{-SiC}$  (T) and (d–f)  $\text{CuFe}_2\text{O}_4/\beta\text{-SiC}$  (UT) respectively.

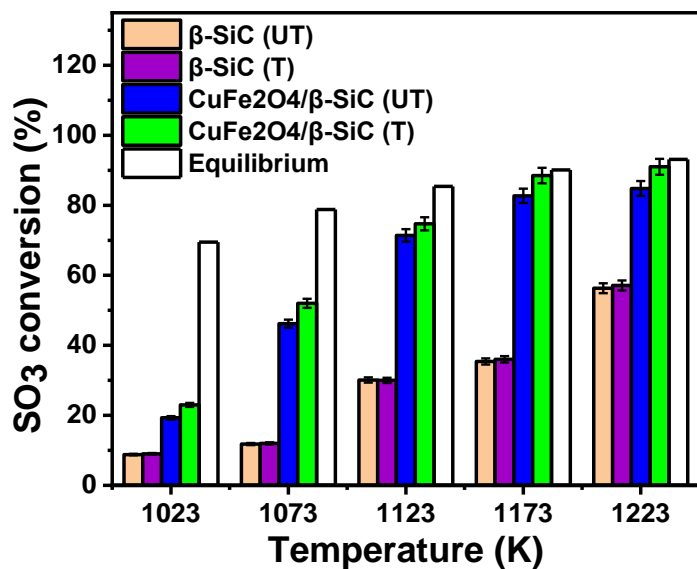

Figure S4 Comparison of  $\text{SO}_3$  conversion (%) of  $\beta\text{-SiC}$  (UT) and  $\beta\text{-SiC}$  (T) with  $\text{CuFe}_2\text{O}_4/\beta\text{-SiC}$  (T) and  $\text{CuFe}_2\text{O}_4/\beta\text{-SiC}$  (UT) in the temperature range of 1023–1223 K.

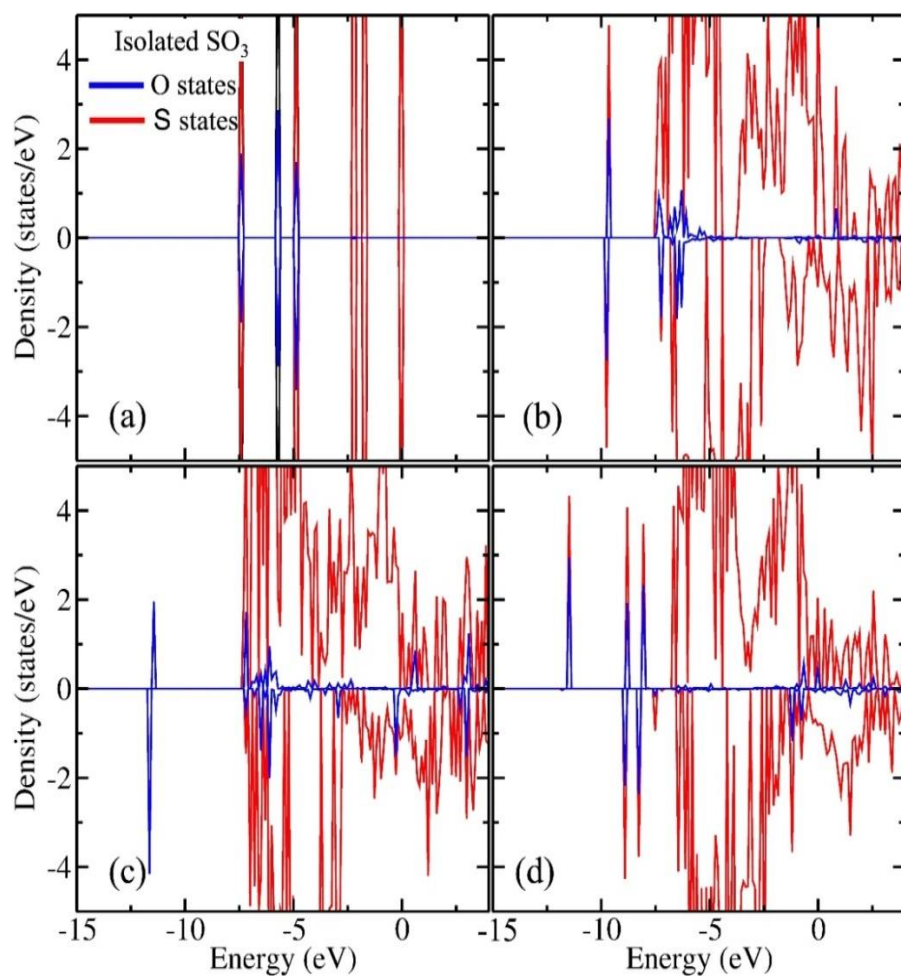

Figure S5 Partial density of states (pDOS) for (a) isolated  $\text{SO}_3$ ,  $\text{SO}_3$  adsorbed over the cluster (b)  $\text{CuFe}_2\text{O}_4$ , (c)  $\text{CuFe}_2\text{O}_4$  with O-vacancy and (d)  $\text{Fe}_2\text{O}_3$  with O-vacancy. Here, blue and red colors correspond to S and O states, respectively.
